# Supplementary material for: From isoselectivity to syndioselectivity: Lewis base regulates stereochemistry in 2-vinylpyridine polymerization
Source: Royal Society of Chemistry journal article supplement (doi:10.1039/d0py00320d), 2020-01-01
Supplement: d0py00320d1.pdf [file d0py00320d1.pdf]

Supporting information

**From Isoselectivity to Syndioselectivity: Lewis Base Regulates Stereochemistry  
in 2-Vinylpyridine Polymerization**

Yu Wang, Jiang-Bing Duan, Zhao-Xuan Liu, and Tie-Qi Xu\*

*Department of Chemistry, School of Chemical Engineering, Dalian University of Technology,  
Dalian 116024, P. R. China*

## 1 Experimental Section

### 1.1 Materials, Reagents, and Methods

All syntheses and manipulations of air- and moisture-sensitive materials were carried out in flamed Schlenk-type glassware on a dual-manifold Schlenk line, on a high-vacuum line, or in an argon-filled glovebox. Toluene and tetrahydrofuran (THF) were distilled from sodium/benzophenone under nitrogen, degassed and stored over fresh Na chips. 2-vinylpyridine (2VP), pyridine (Py), 2-Me-pyridine, 2,6-Me<sub>2</sub>-pyridine, 2,6-Ph<sub>2</sub>-pyridine, and n-hexane were dried over CaH<sub>2</sub> while stirring for 48 h and distilled before use, and then degassed and stored over 4 Å sieves. C<sub>6</sub>D<sub>6</sub> was dried over sodium. CDCl<sub>3</sub> and CD<sub>2</sub>Cl<sub>2</sub> were dried over CaH<sub>2</sub>, and then degassed and stored over 4 Å sieves. NMR spectra were recorded on a Varian Inova 300 (FT 300 MHz, <sup>1</sup>H; 75 MHz, <sup>13</sup>C), or a Varian Inova 400 MHz spectrometer, or a Varian Inova 500 MHz spectrometer. <sup>1</sup>H and <sup>13</sup>C NMR chemical shifts were referred to SiMe<sub>4</sub> (TMS). The molecular weight and molecular weight distribution of the polymers were measured by Agilent Technologies 1260 Infinity GPC (Column: PL gel 5µm MIXED-C) at 30 °C using DMF as an eluent (the flowing rate is 1.0 mL/min) against poly(2-vinylpyridine) (P2VP) standards.

Literature procedures were employed or modified for the preparation of the following complexes: (C<sub>5</sub>Me<sub>4</sub>SiMe<sub>3</sub>)Sc(CH<sub>2</sub>SiMe<sub>3</sub>)<sub>2</sub>(THF), (C<sub>5</sub>Me<sub>4</sub>SiMe<sub>3</sub>)Y(CH<sub>2</sub>SiMe<sub>3</sub>)<sub>2</sub>(THF), (C<sub>5</sub>Me<sub>4</sub>SiMe<sub>3</sub>)Lu(CH<sub>2</sub>SiMe<sub>3</sub>)<sub>2</sub>(THF).<sup>1</sup>

### 1.2 Typical polymerization procedure

#### 1.2.1 Substituted pyridine as Lewis base

In the glove box, a toluene solution (1 mL) of [Ph<sub>3</sub>C][B(C<sub>6</sub>F<sub>5</sub>)<sub>4</sub>] (10 mg, 10 µmol) was added to a toluene solution (1 mL) of (C<sub>5</sub>Me<sub>4</sub>SiMe<sub>3</sub>)Sc(CH<sub>2</sub>SiMe<sub>3</sub>)<sub>2</sub>(THF) (5 mg, 10 µmol) in a 20-mL flask. The mixture was stirred at room temperature for a few minutes, and 10 µmol of 2-Me-pyridine was added under vigorous stirring. The mixture was stirred at room temperature for a few minutes, and 2 mmol of 2VP was added under vigorous stirring. After the measured time interval, a 0.1 mL aliquot was taken from the reaction mixture via syringe and quickly quenched into a 2-mL vial containing 0.5 mL of undried “wet” CDCl<sub>3</sub> stabilized by 250 ppm of BHT; the quenched aliquots were analyzed by <sup>1</sup>H NMR to obtain the percent monomer conversion data. The polymerization was immediately quenched, after the removal of the aliquot, by addition of 5

mL wet n-hexane. The quenched mixture was precipitated into 100 mL of n-hexane, stirred for 1 h, filtered, washed with n-hexane, and dried in a vacuum oven at 25 °C overnight to a constant weight.

### 1.2.2 Styrene as Lewis base

In the glove box, a toluene solution (1 mL) of  $[\text{Ph}_3\text{C}][\text{B}(\text{C}_6\text{F}_5)_4]$  (10 mg, 10  $\mu\text{mol}$ ) was added to a toluene solution (1 mL) of  $(\text{C}_5\text{Me}_4\text{SiMe}_3)\text{Sc}(\text{CH}_2\text{SiMe}_3)_2(\text{THF})$  (5 mg, 10  $\mu\text{mol}$ ) in a 20-mL flask. The mixture was stirred at room temperature for a few minutes, and a mixture of 2 mmol of styrene and 2 mmol of 2VP was added under vigorous stirring. After the measured time interval, a 0.1 mL aliquot was taken from the reaction mixture via syringe and quickly quenched into a 2- mL vial containing 0.5 mL of undried “wet”  $\text{CDCl}_3$  stabilized by 250 ppm of BHT; the quenched aliquots were analyzed by  $^1\text{H}$  NMR to obtain the percent monomer conversion data. The polymerization was immediately quenched, after the removal of the aliquot, by addition of 5 mL wet n-hexane. The quenched mixture was precipitated into 100 mL of n-hexane, stirred for 1 h, filtered, washed with n-hexane, and dried in a vacuum oven at 25 °C overnight to a constant weight.

### 1.3 Polymer characterizations

Polymer number ( $M_n$ ) and weight ( $M_w$ ) average molecular weights and polydispersity index ( $= M_w/M_n$ ) were measured by gel permeation chromatography (GPC) analyses carried out at 30 °C and a flow rate of 1.0 mL/min with DMF as the eluent, on an Agilent 1260 GPC instrument equipped with four PLgel 5  $\mu\text{m}$  mixed-C columns (Polymer Laboratories; linear range of molecular weight = 200 - 2,000,000). The instrument was calibrated with 10 P(2-VP) standards.

### 1.4 Wide Angle X-ray Diffraction (WAXD)

Powder X-ray diffraction data were collected on an EMPYREAN diffractometer with Cu KR radiation ( $\lambda = 1.54056 \text{ \AA}$ ) over the  $2\theta$  range of 5 – 40° with a scan speed of 0.3333°/s and a step size of 0.01° at room temperature.

### 1.5 Differential Scanning Calorimetry (DSC)

DSC was carried out with a NETZSCH DSC 206 thermal analyzer and the samples are analyzed with a heating rate of 10 K/min and a cooling rate of 10 K/min. Due to the slow recrystallization of the melted P2VP, only one heating and cooling cycle was performed.

## Supporting information

Therefore, the melting point ( $T_m$ ) and glass transition temperature ( $T_g$ ) were taken from the first heat. The middle point of raw data was taken as  $T_g$ .

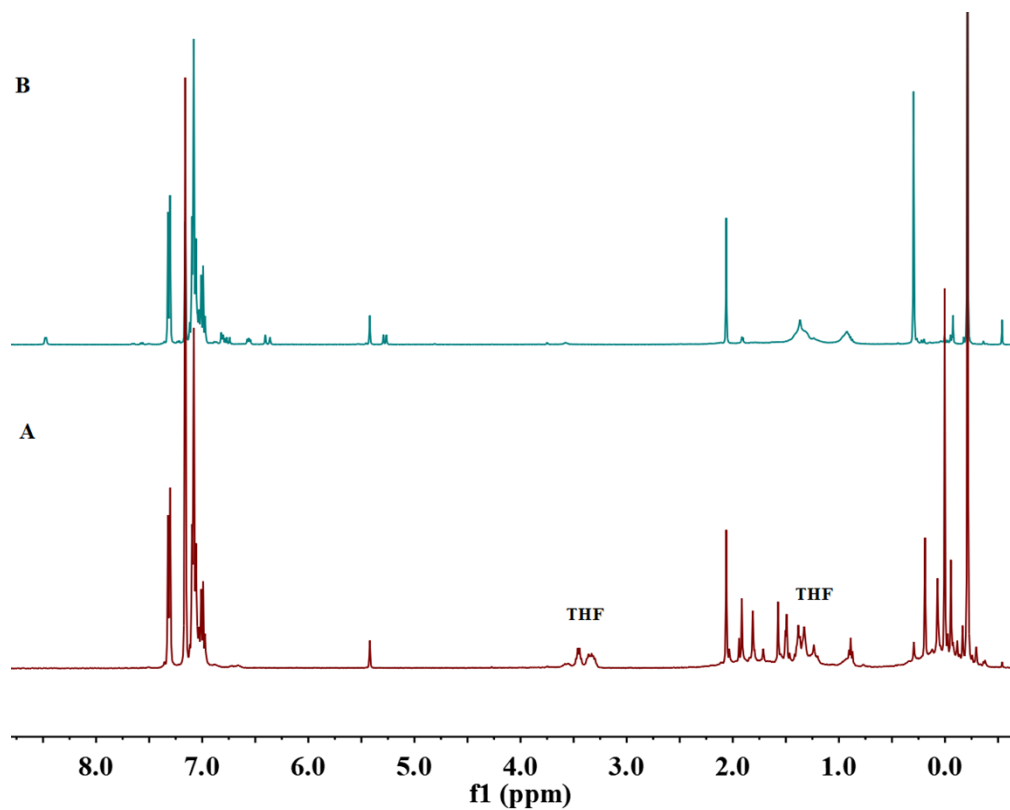

Figure S1.  $^1\text{H}$  NMR spectrum of a mixture of 10  $\mu\text{mol}$  of catalyst 1 and 10  $\mu\text{mol}$  of  $[\text{Ph}_3\text{C}][\text{B}(\text{C}_6\text{F}_5)_4]$  (A); a mixture after adding 100  $\mu\text{mol}$  of 2VP and removing volatile substance (B).

Supporting information

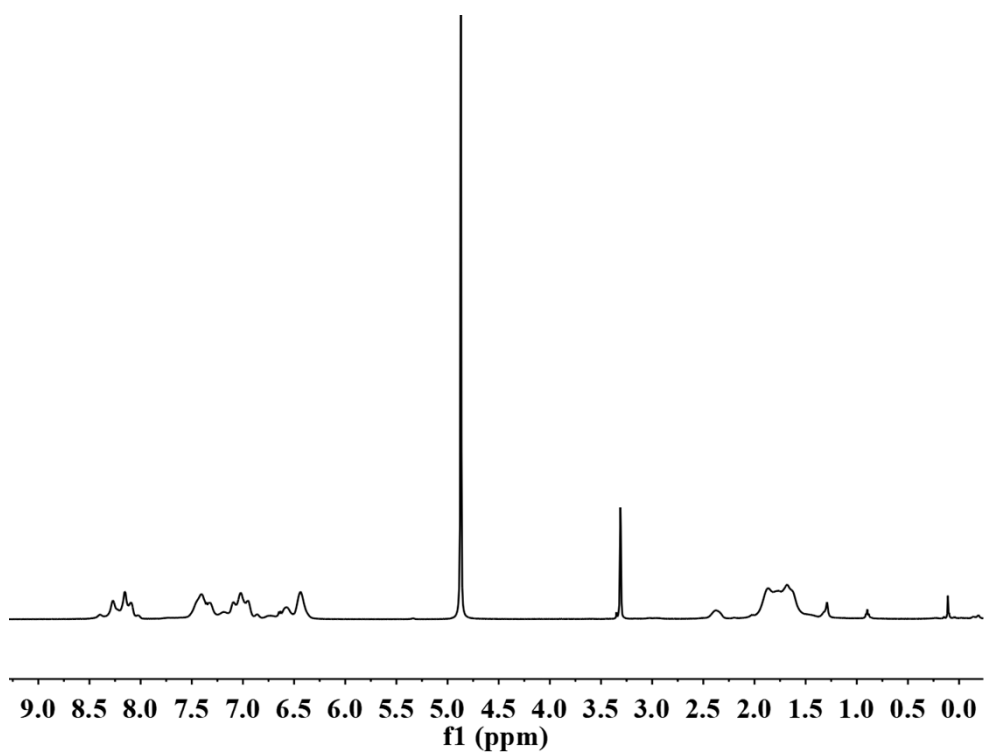

Figure S2. <sup>1</sup>H NMR spectrum of P2VP oligomer produced by catalyst 1.

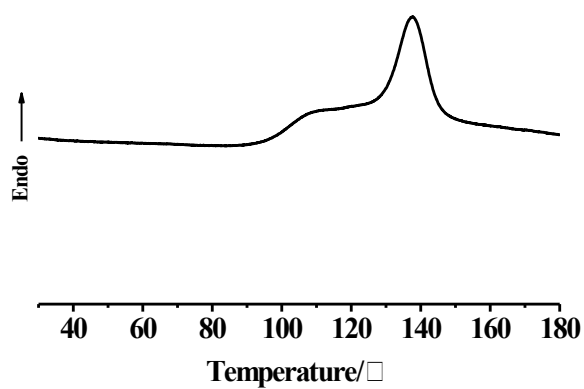

Figure S3. DSC profile of P2VP produced by catalyst 1 (run 17, Table 1).

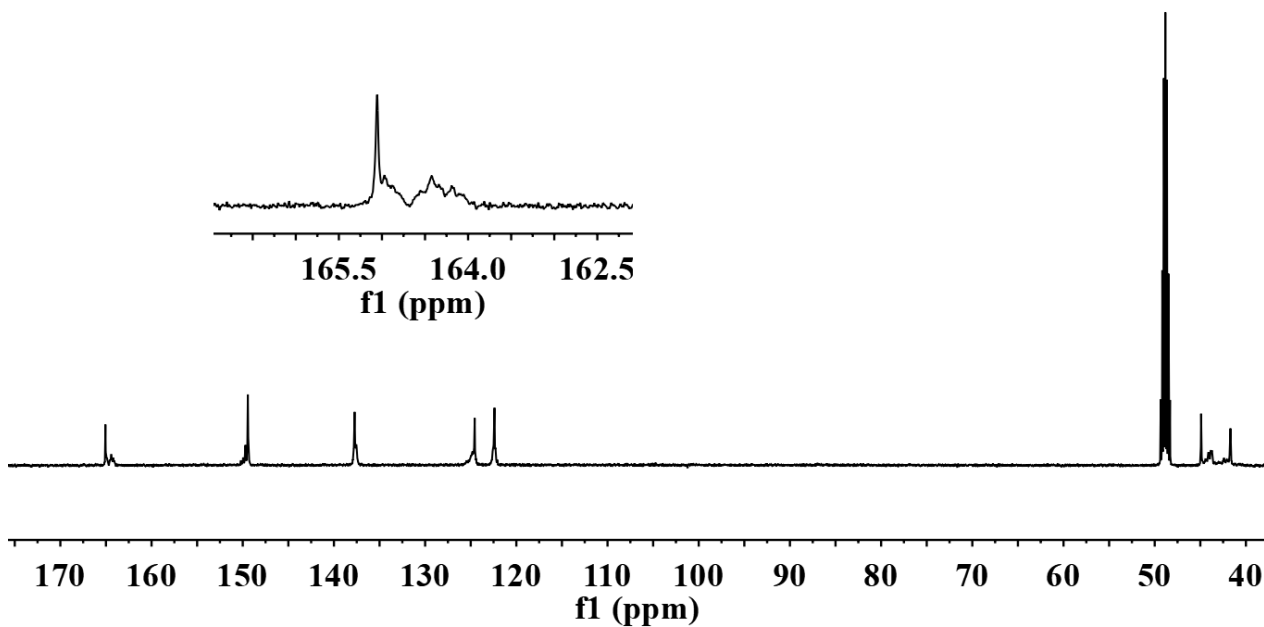

**Figure S4.** The  $^{13}\text{C}$  NMR spectrum of P2VP obtained from 2VP by using catalyst **1** in toluene at 25 °C in  $\text{CD}_3\text{OD}$  (run 2, Table 1).

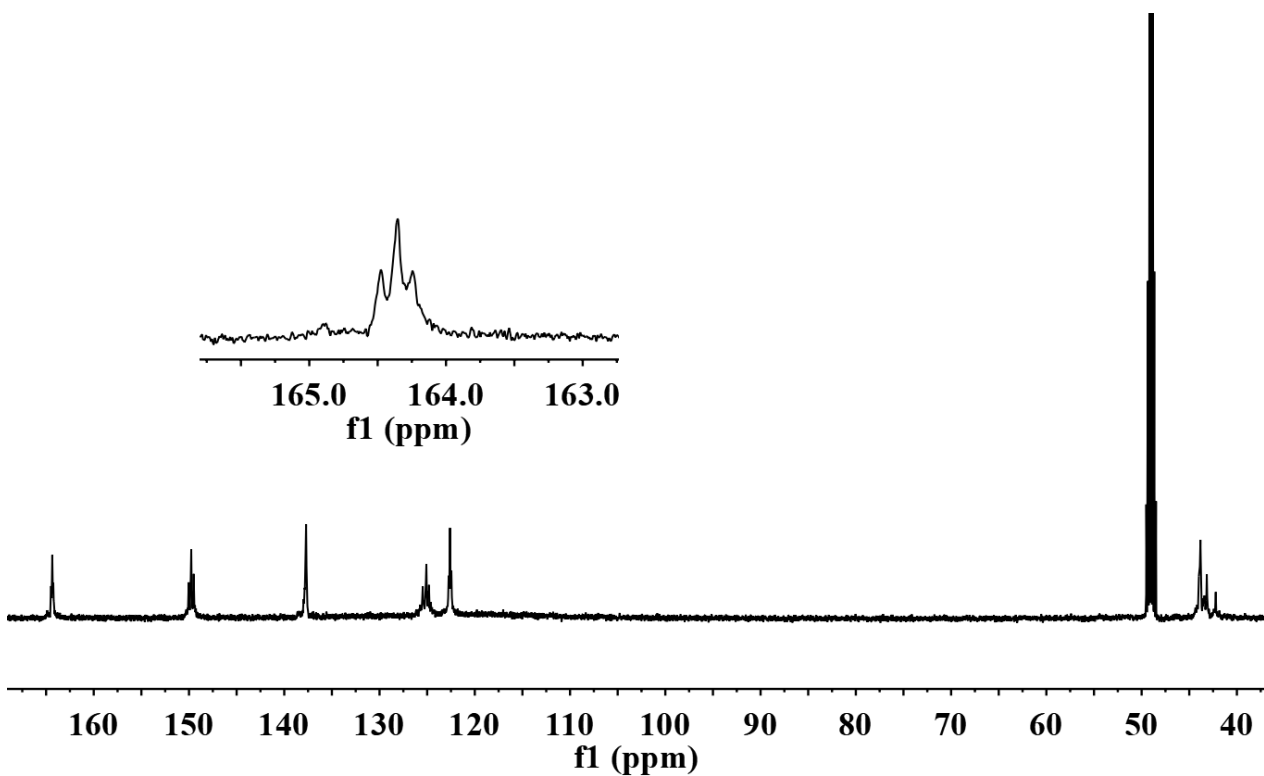

**Figure S5.** The  $^{13}\text{C}$  NMR spectrum of P2VP obtained from 2VP by using catalyst **1** in toluene at 25 °C in  $\text{CD}_3\text{OD}$  (run 9, Table 1).

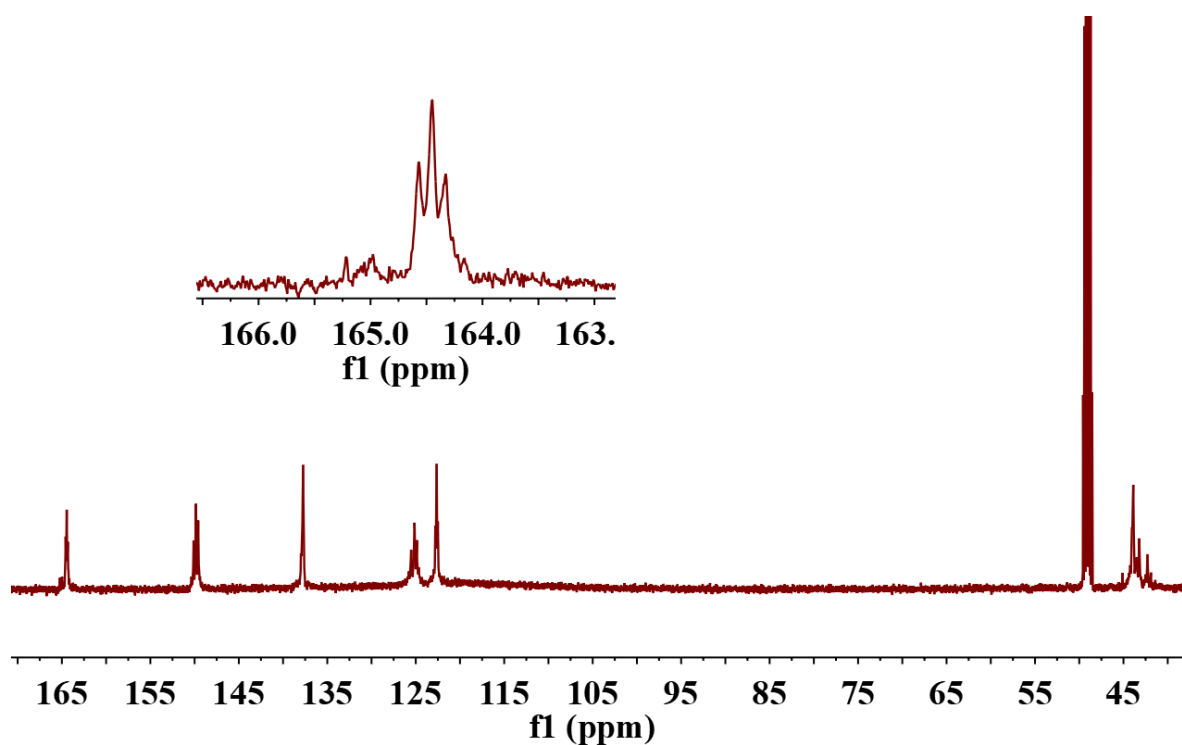

**Figure S6.** The  $^{13}\text{C}$  NMR spectrum of P2VP obtained from 2VP by using catalyst 1 in toluene at 25 °C in  $\text{CD}_3\text{OD}$  (run 11, Table 1).

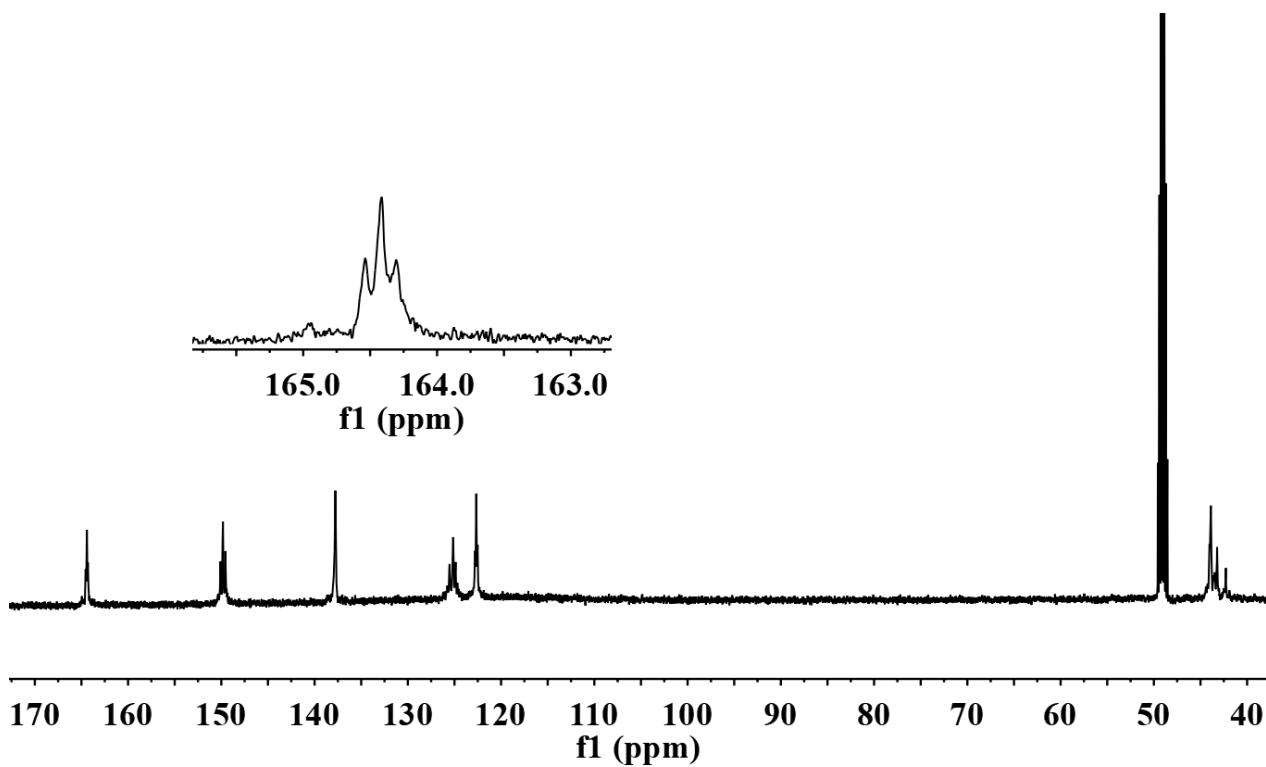

**Figure S7.** The  $^{13}\text{C}$  NMR spectrum of P2VP obtained from 2VP by using catalyst 1 in toluene at 25 °C in  $\text{CD}_3\text{OD}$  (run 12, Table 1).

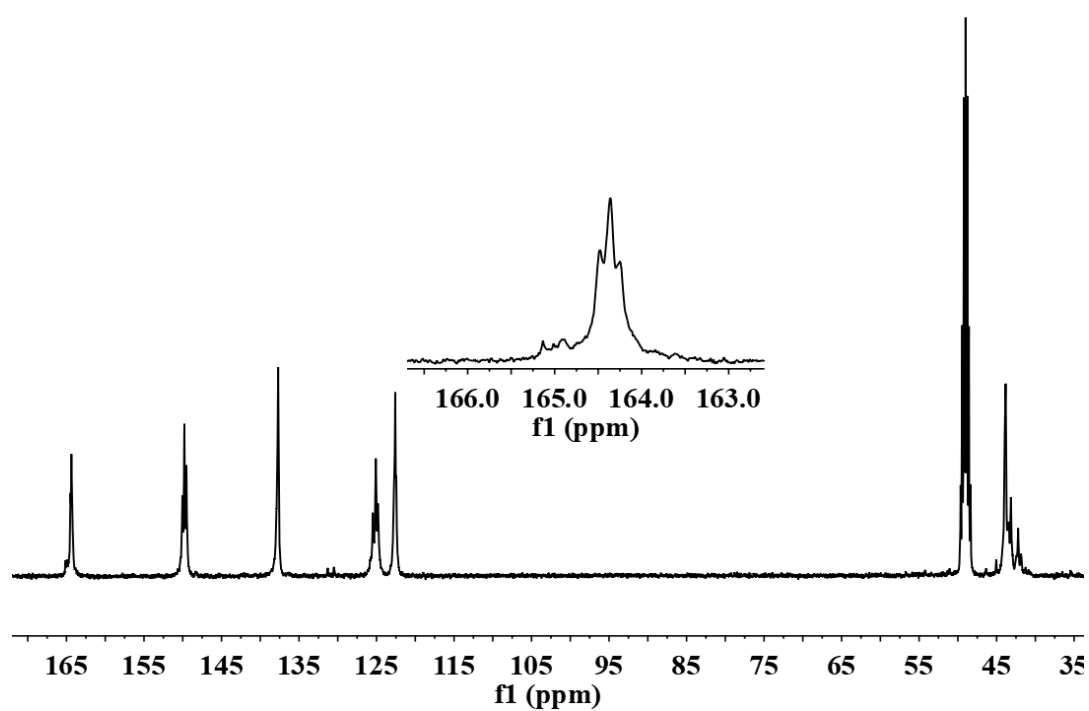

**Figure S8.** The  $^{13}\text{C}$  NMR spectrum of P2VP obtained from 2VP by using catalyst **1** in toluene at 25 °C in  $\text{CD}_3\text{OD}$  (run 13, Table 1).

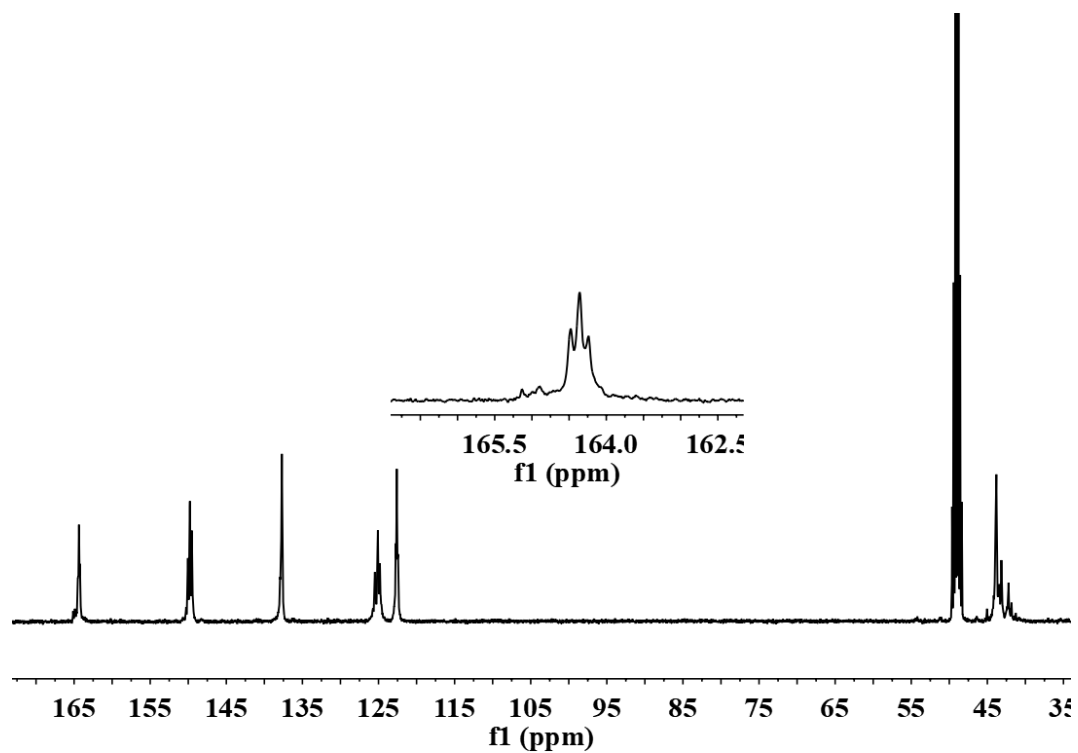

**Figure S9.** The  $^{13}\text{C}$  NMR spectrum of P2VP obtained from 2VP by using catalyst **1** in toluene at 25 °C in  $\text{CD}_3\text{OD}$  (run 14, Table 1).



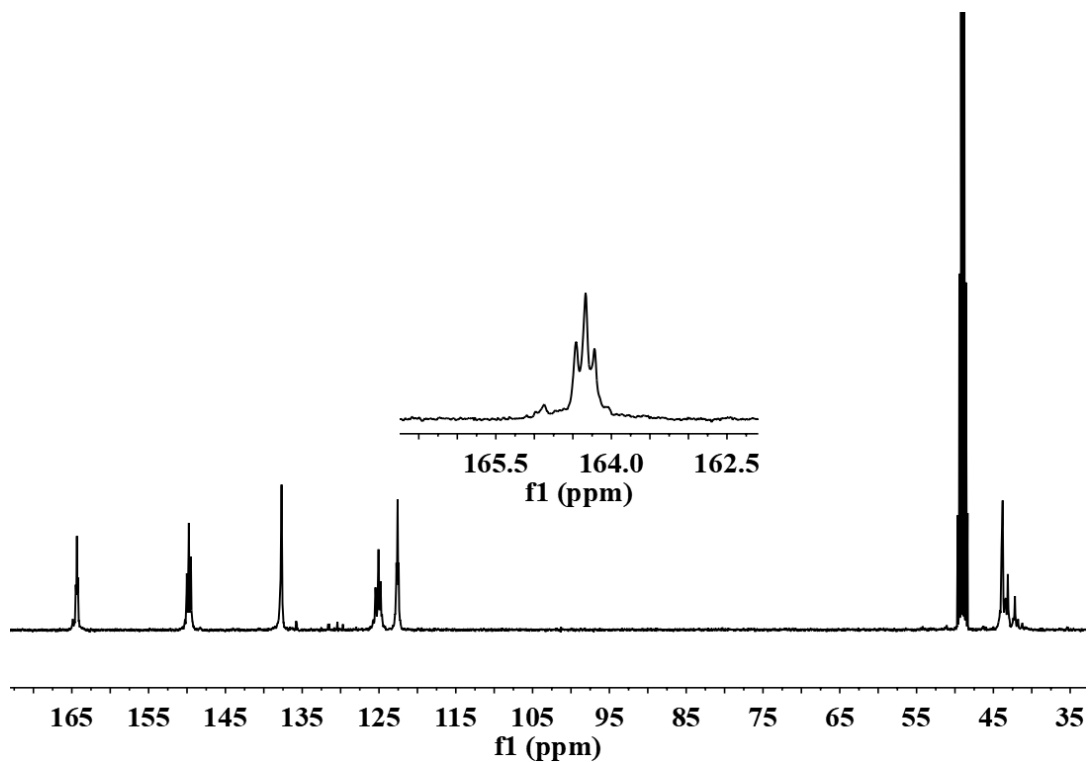

**Figure S10.** The  $^{13}\text{C}$  NMR spectrum of P2VP obtained from 2VP by using catalyst **1** in toluene at 25 °C in  $\text{CD}_3\text{OD}$  (run 15, Table 1).

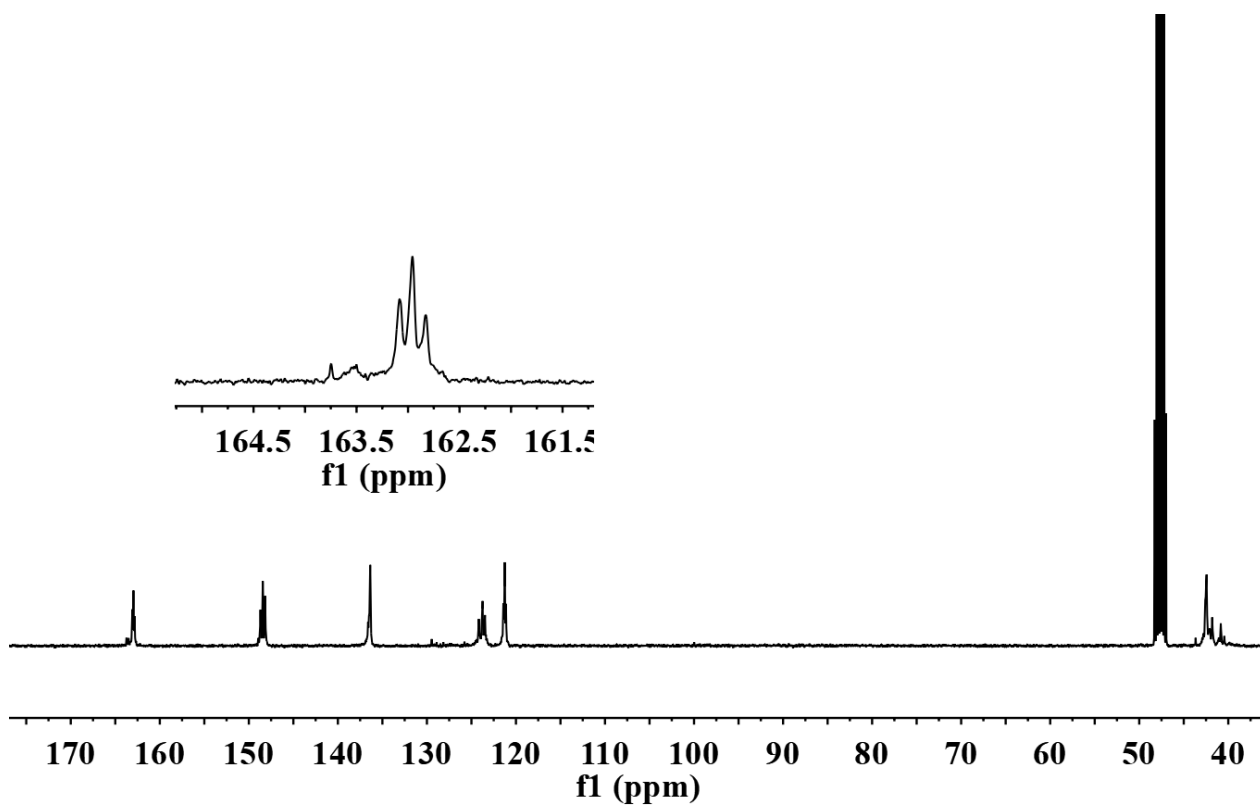

**Figure S11.** The  $^{13}\text{C}$  NMR spectrum of P2VP obtained from 2VP by using catalyst **1** in toluene at 25 °C in  $\text{CD}_3\text{OD}$  (run 18, Table 1).

**REFERENCES**

- [1] Luo, Y.; Baldamus, J.; Hou, Z. *J. Am. Chem. Soc.* **2004**, *126*, 13910-13911.
